# Supplementary material
Source: PubMed Central journal article supplement (PMC2862136)
Supplement: NIHMS193298-supplement-1_si_001.pdf [file NIHMS193298-supplement-1_si_001.pdf]

# Synthesis of Notoamide J: A Potentially Pivotal Intermediate in the Biosynthesis of Several Prenylated Indole Alkaloids from Fungi.

Jennifer M. Finefield and Robert M. Williams  
*Department of Chemistry, Colorado State University  
Fort Collins, Colorado 80523, U.S.A.*

## SUPPORTING INFORMATION

|                                                                                                                        |        |
|------------------------------------------------------------------------------------------------------------------------|--------|
| General Methods                                                                                                        | S1     |
| Copies of <sup>1</sup> H NMR and <sup>13</sup> C NMR Spectra of Compounds<br><b>8, 9, 10, 11, 12, 13, 14, 2, and 1</b> | S2-S16 |
| Copy of <sup>1</sup> H NMR Spectrum of Natural Notoamide J                                                             | S17    |
| Comparison of CD of Natural Notoamide J with that of Synthetic <b>1</b>                                                | S18    |
| References                                                                                                             | S19    |

### General Methods

<sup>1</sup>H and <sup>13</sup>C spectra were obtained using 300 MHz or 400 MHz spectrometers. The chemical shifts are given in parts per million (ppm) relative to TMS at δ 0.00 ppm or to residual CDCl<sub>3</sub> δ 7.26 ppm for proton spectra and relative to CDCl<sub>3</sub> at δ 77.23 ppm for carbon spectra. IR spectra were recorded on an FT-IR spectrometer as thin films. Mass spectra were obtained using a high/low resolution magnetic sector mass spectrometer. Flash column chromatography was performed with silica gel grade 60 (230-400 mesh). Unless otherwise noted materials were obtained from commercially available sources and used without further purification. Dichloromethane (CH<sub>2</sub>Cl<sub>2</sub>), tetrahydrofuran (THF), toluene (PhMe), *N, N*-dimethylformamide (DMF), acetonitrile (CH<sub>3</sub>CN), triethylamine (Et<sub>3</sub>N), and methanol (MeOH) were all degassed with argon and passed through a solvent purification system containing alumina or molecular sieves.

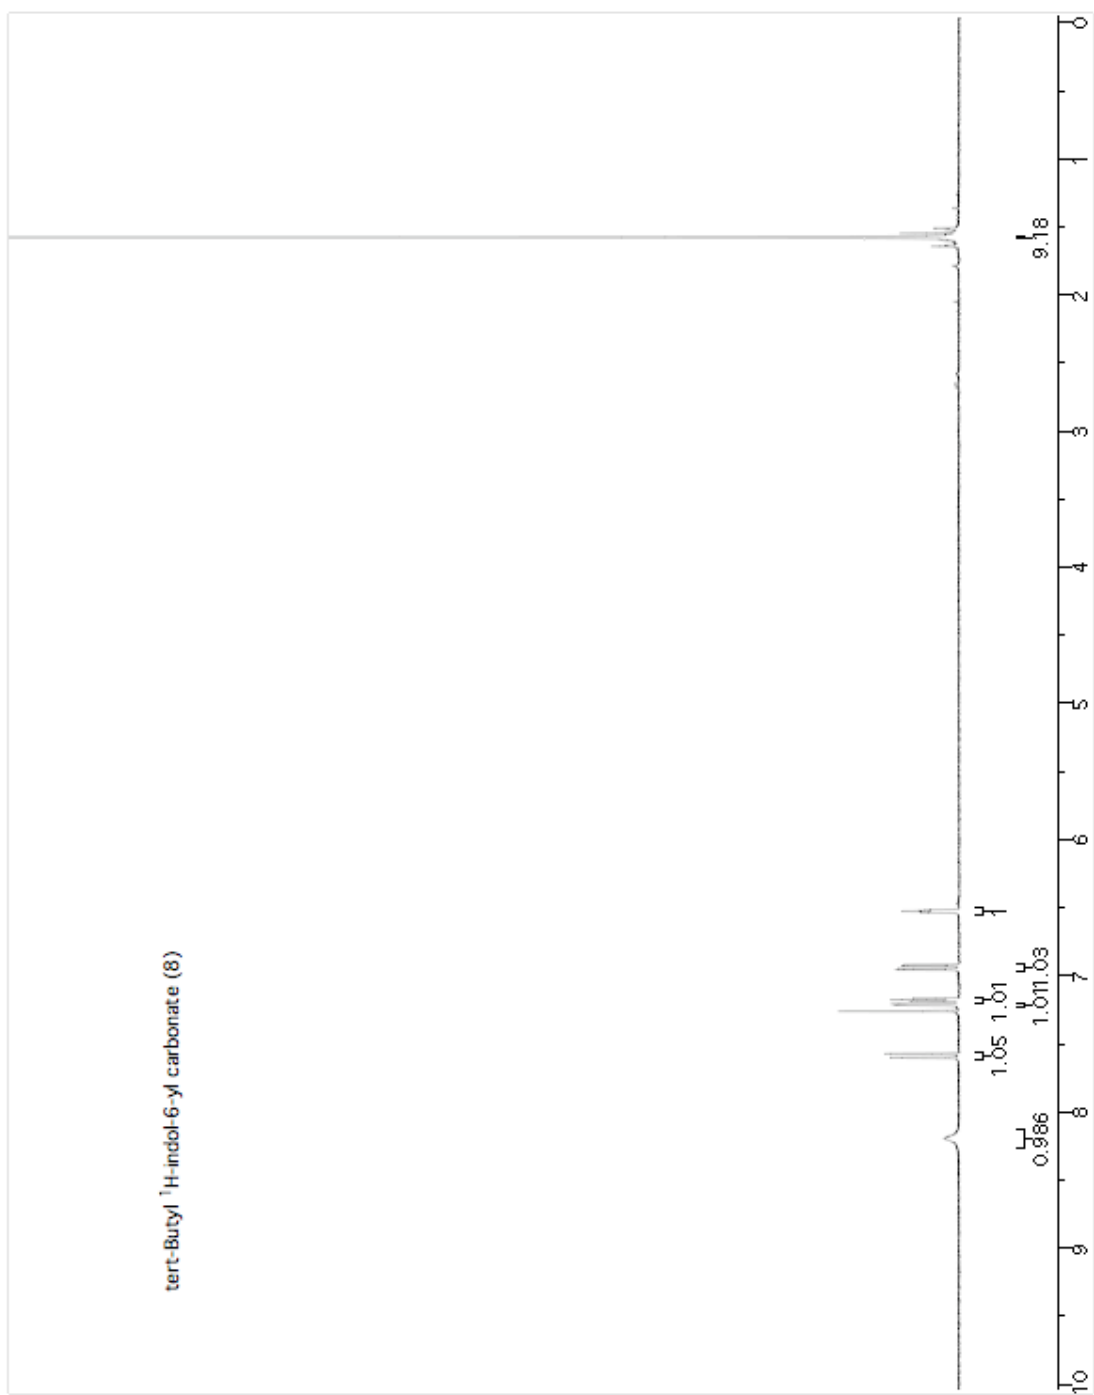

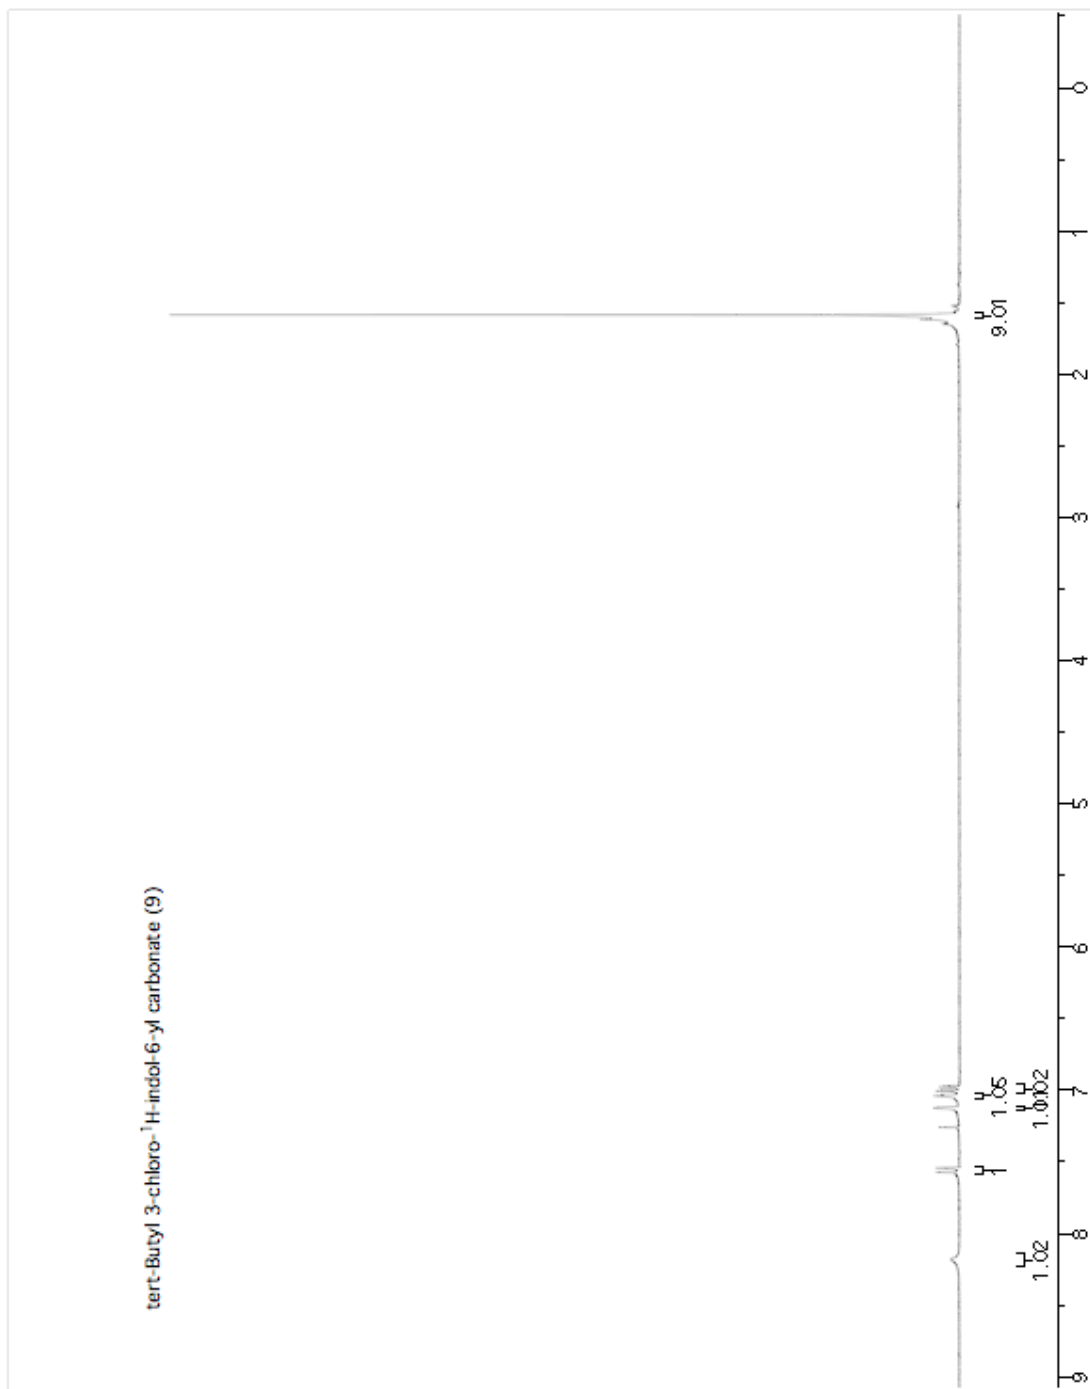

tert-Butyl 2-(2-methylbut-3-en-2-yl)-1H-indol-6-yl carbonate (10)

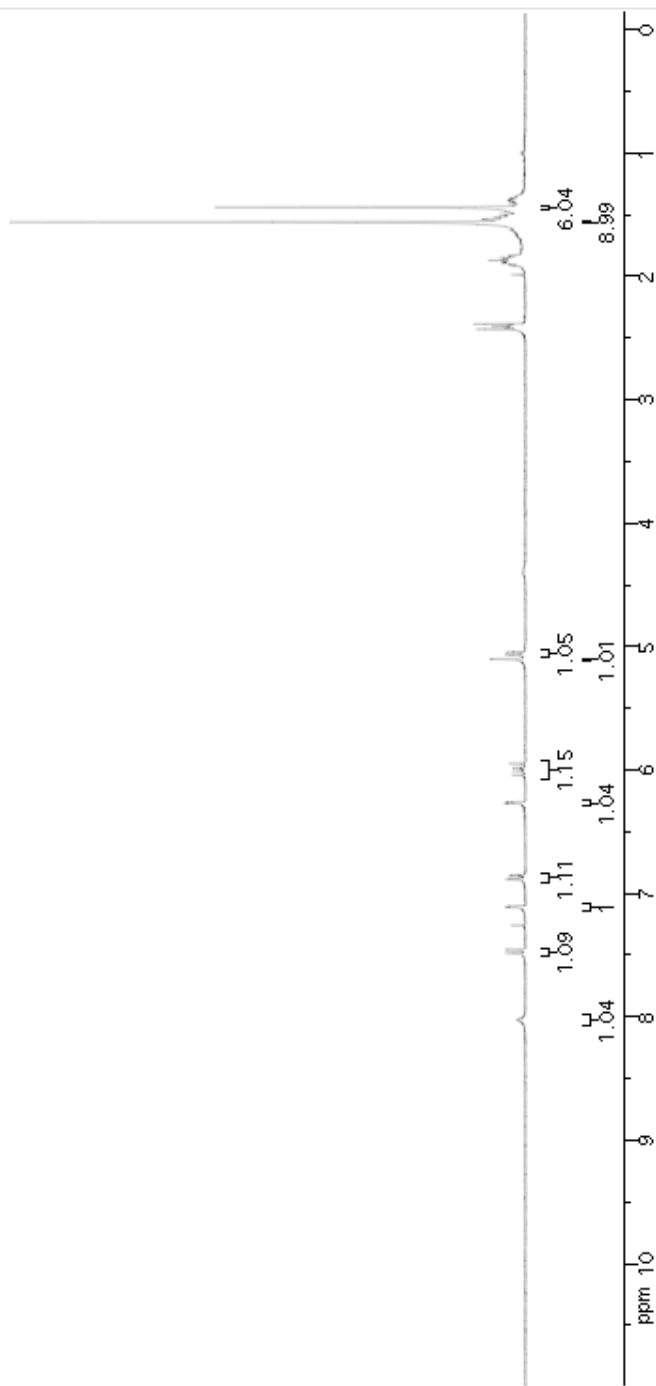

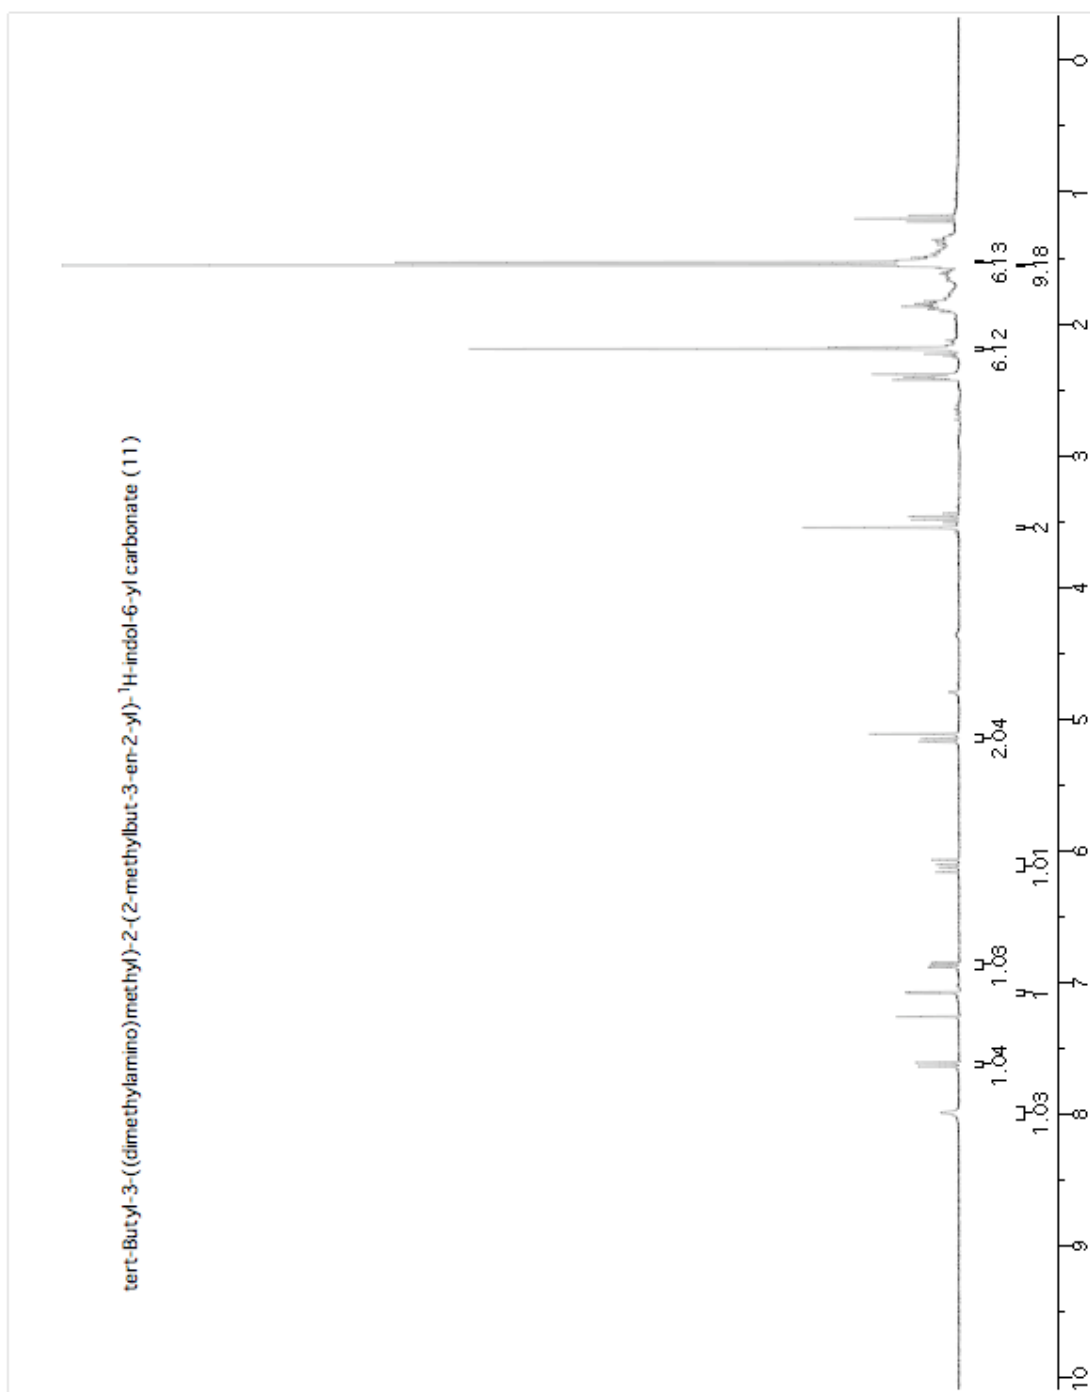

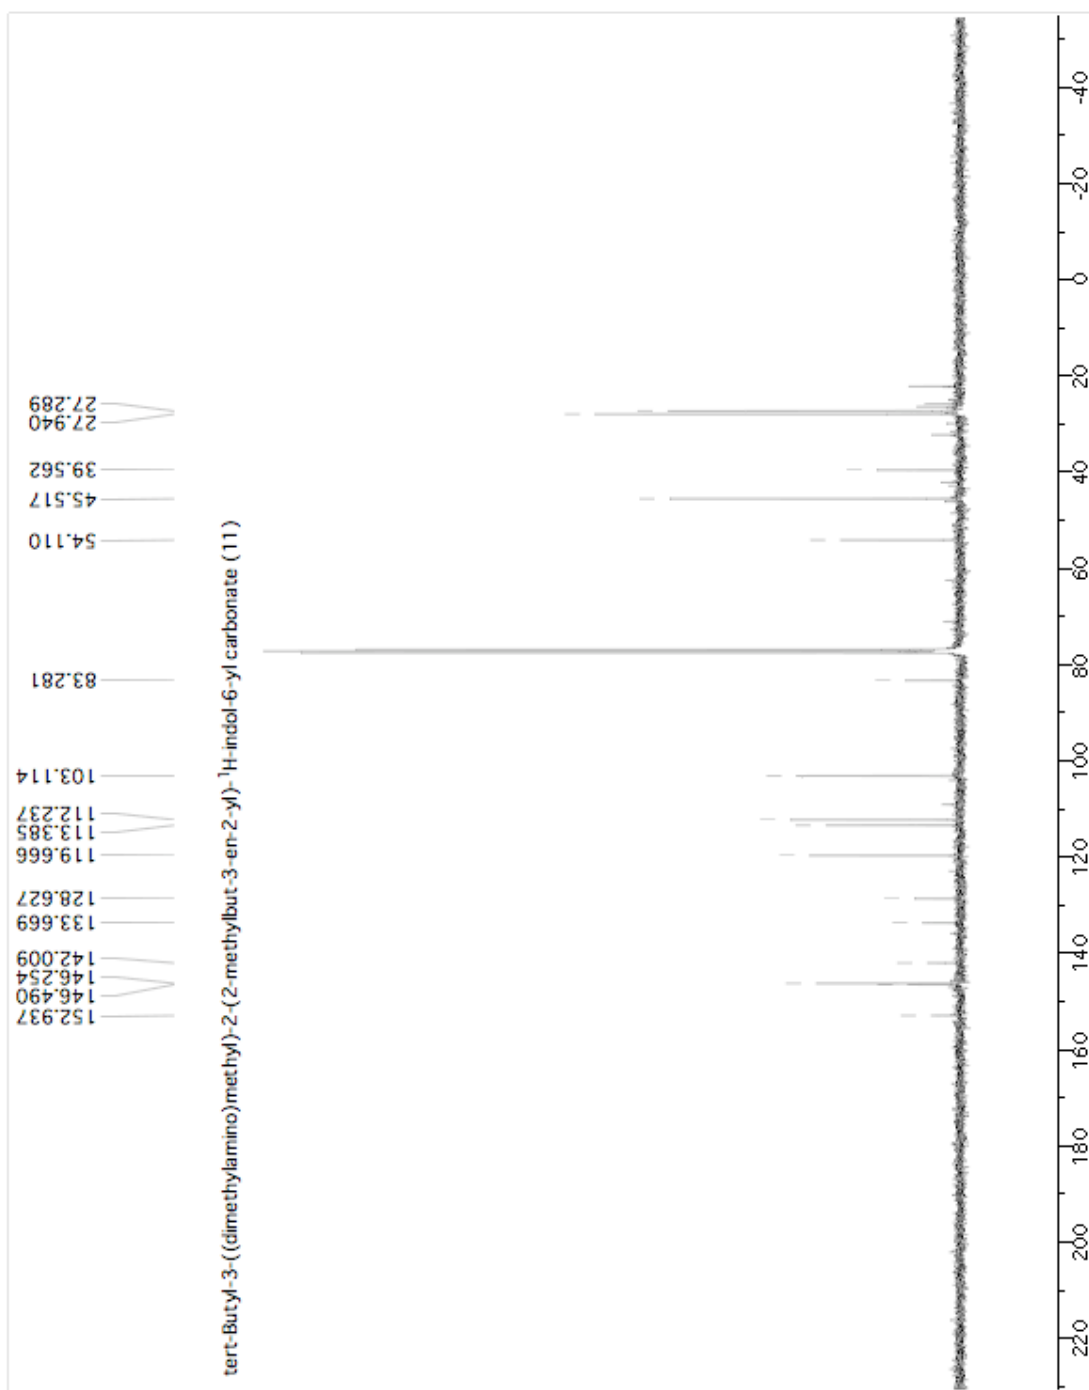

Ethyl 2-amino-3-(6-((tert-butoxycarbonyloxy)-2-(2-methylbut-3-en-2-yl)-1H-indol-3-yl)propanoate (12)

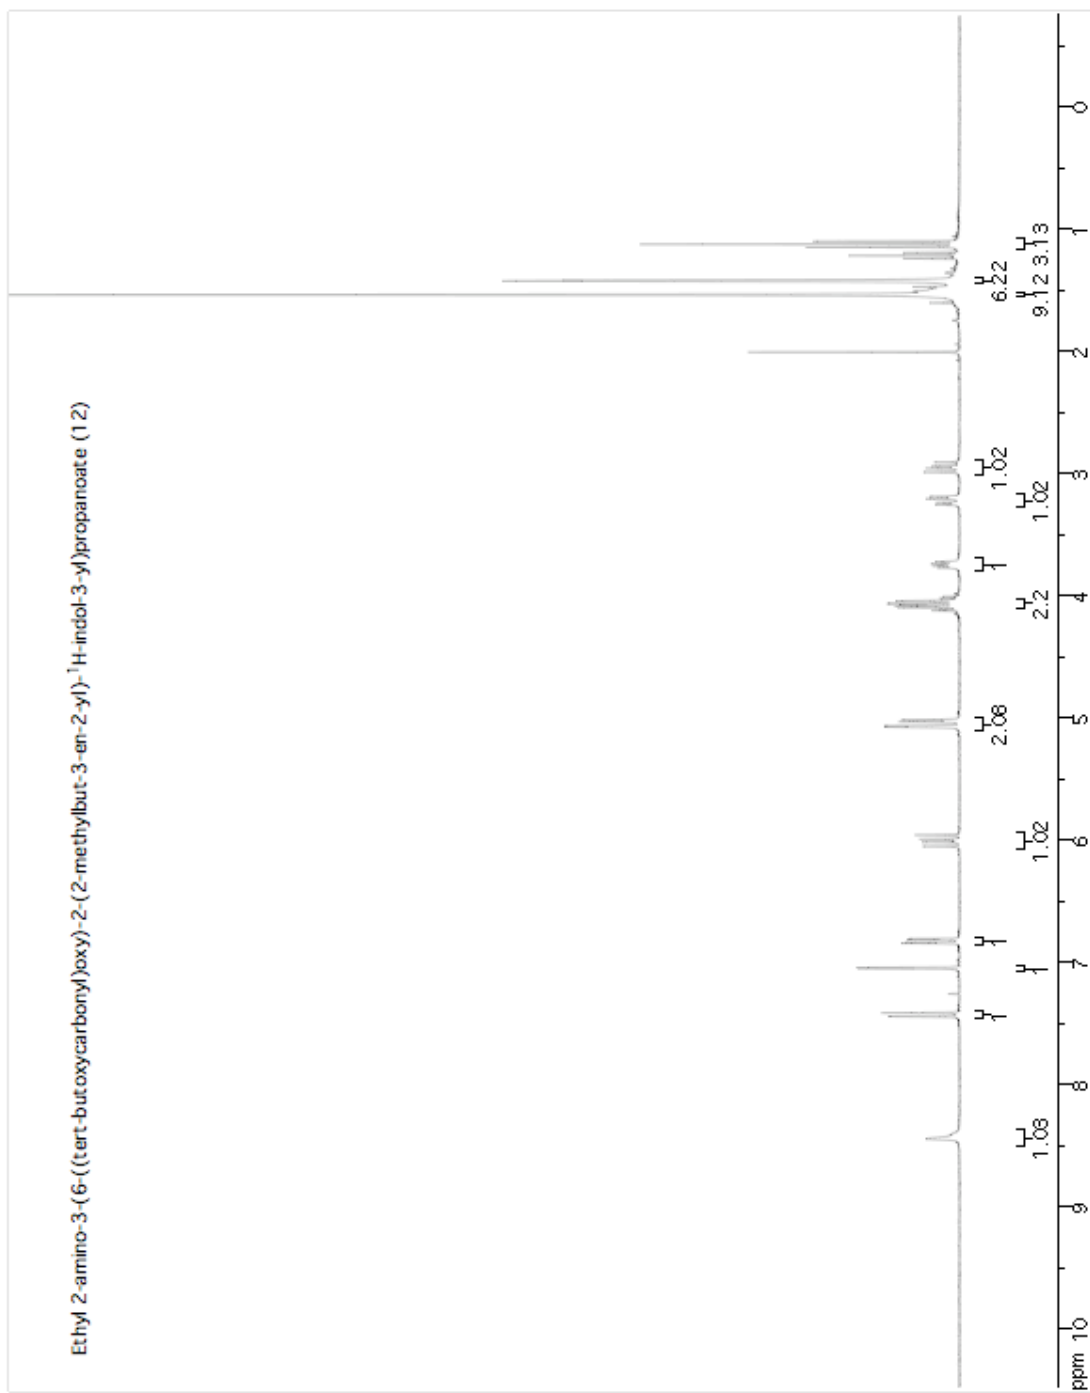

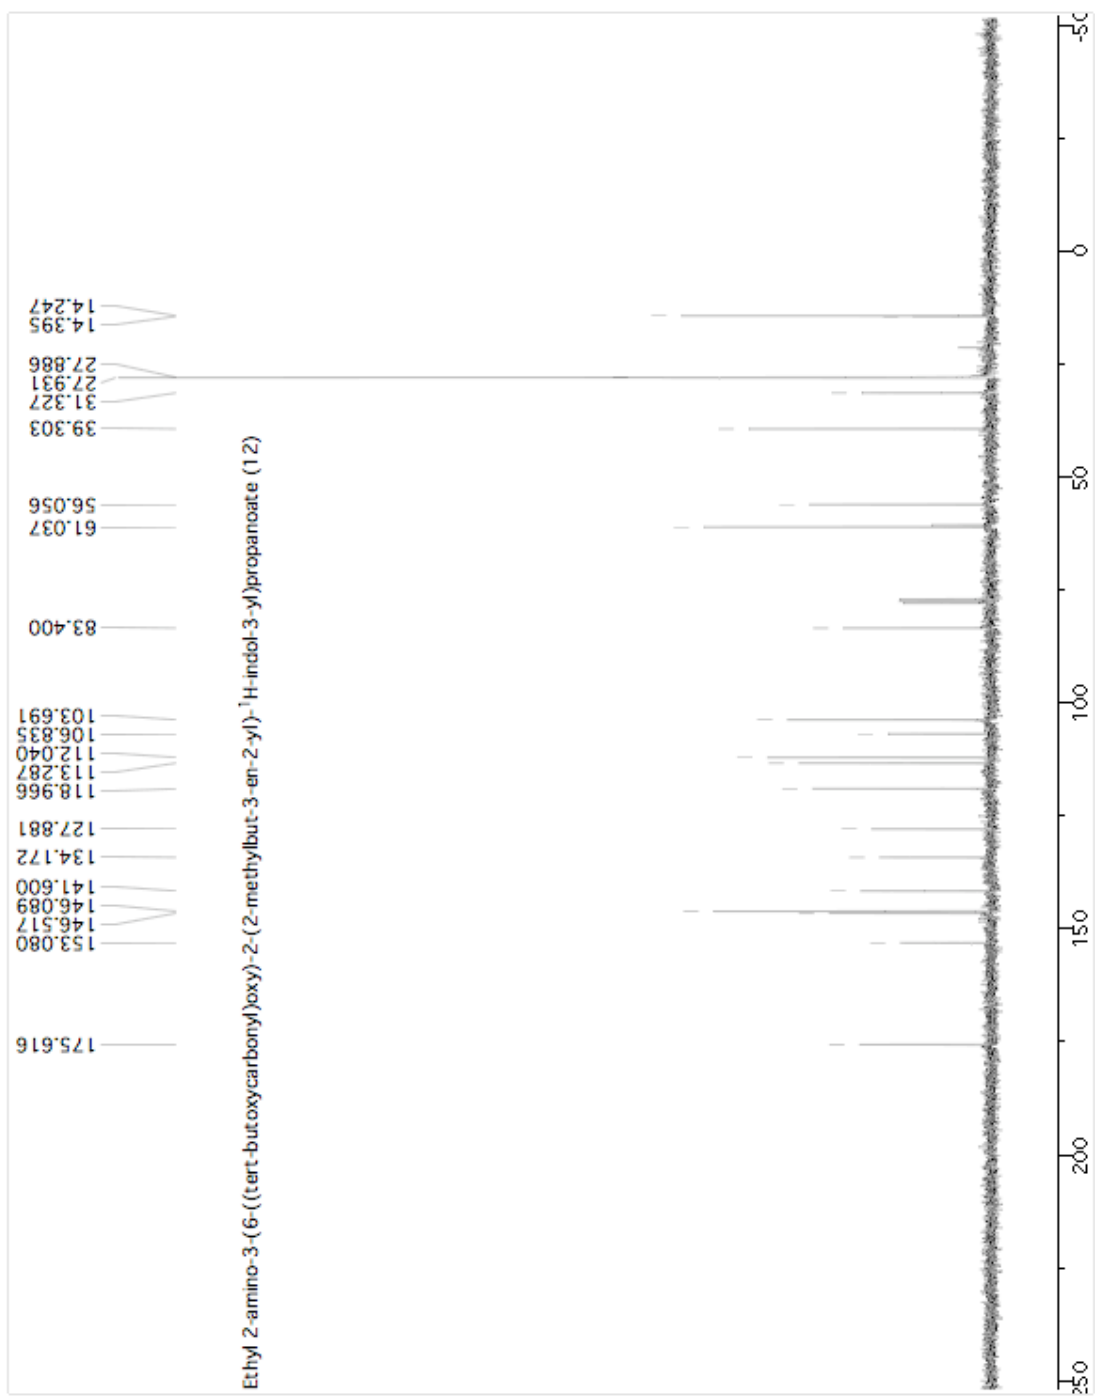



ethyl 2-((tert-butoxycarbonyl)amino)-3-(6-((tert-butoxycarbonyloxy)-2-(2-methylbut-3-en-2-yl)-1H-indol-3-yl)propanoate (13)

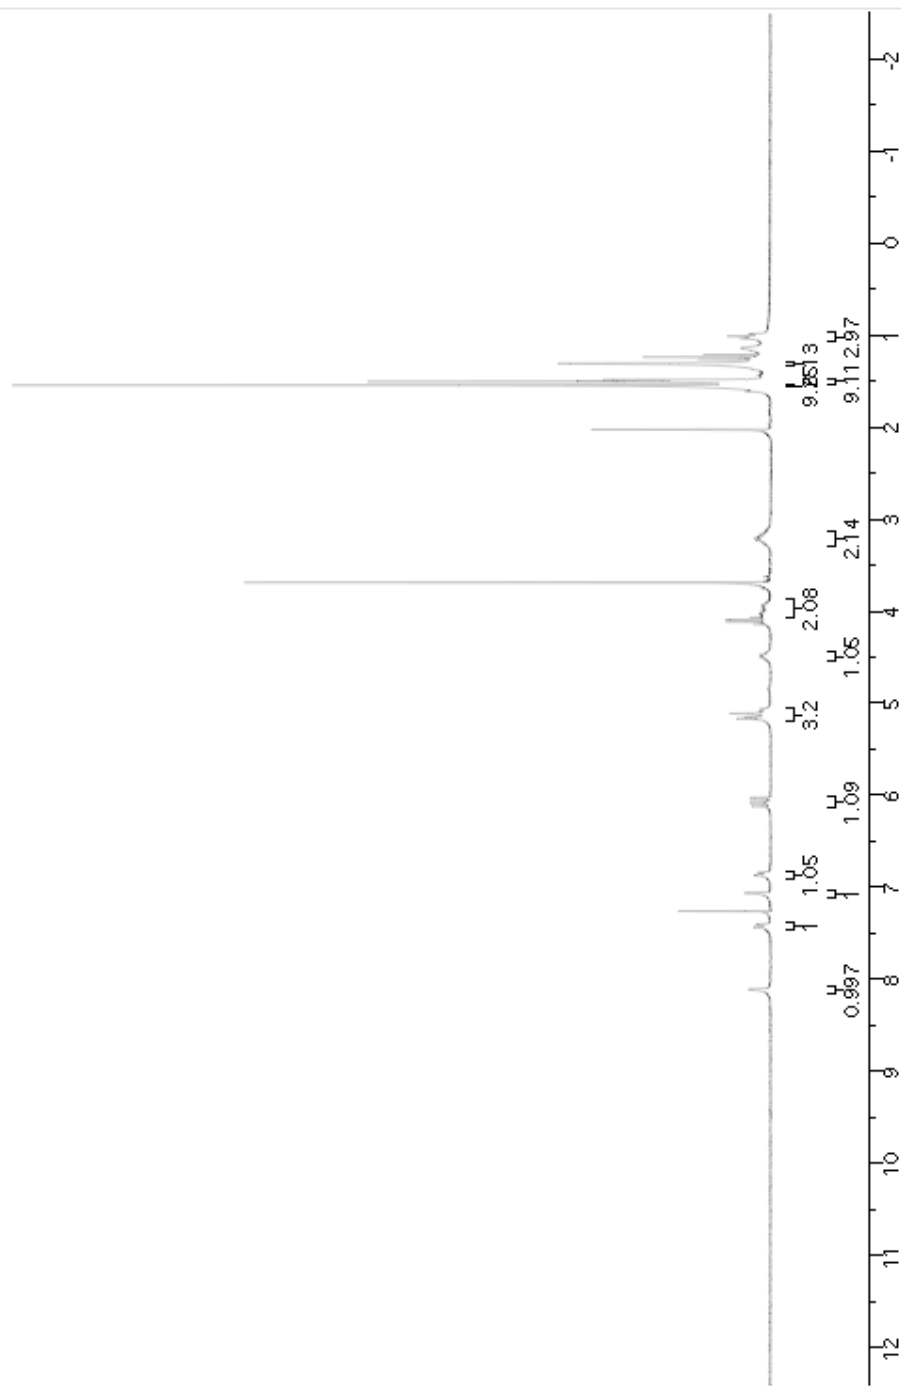

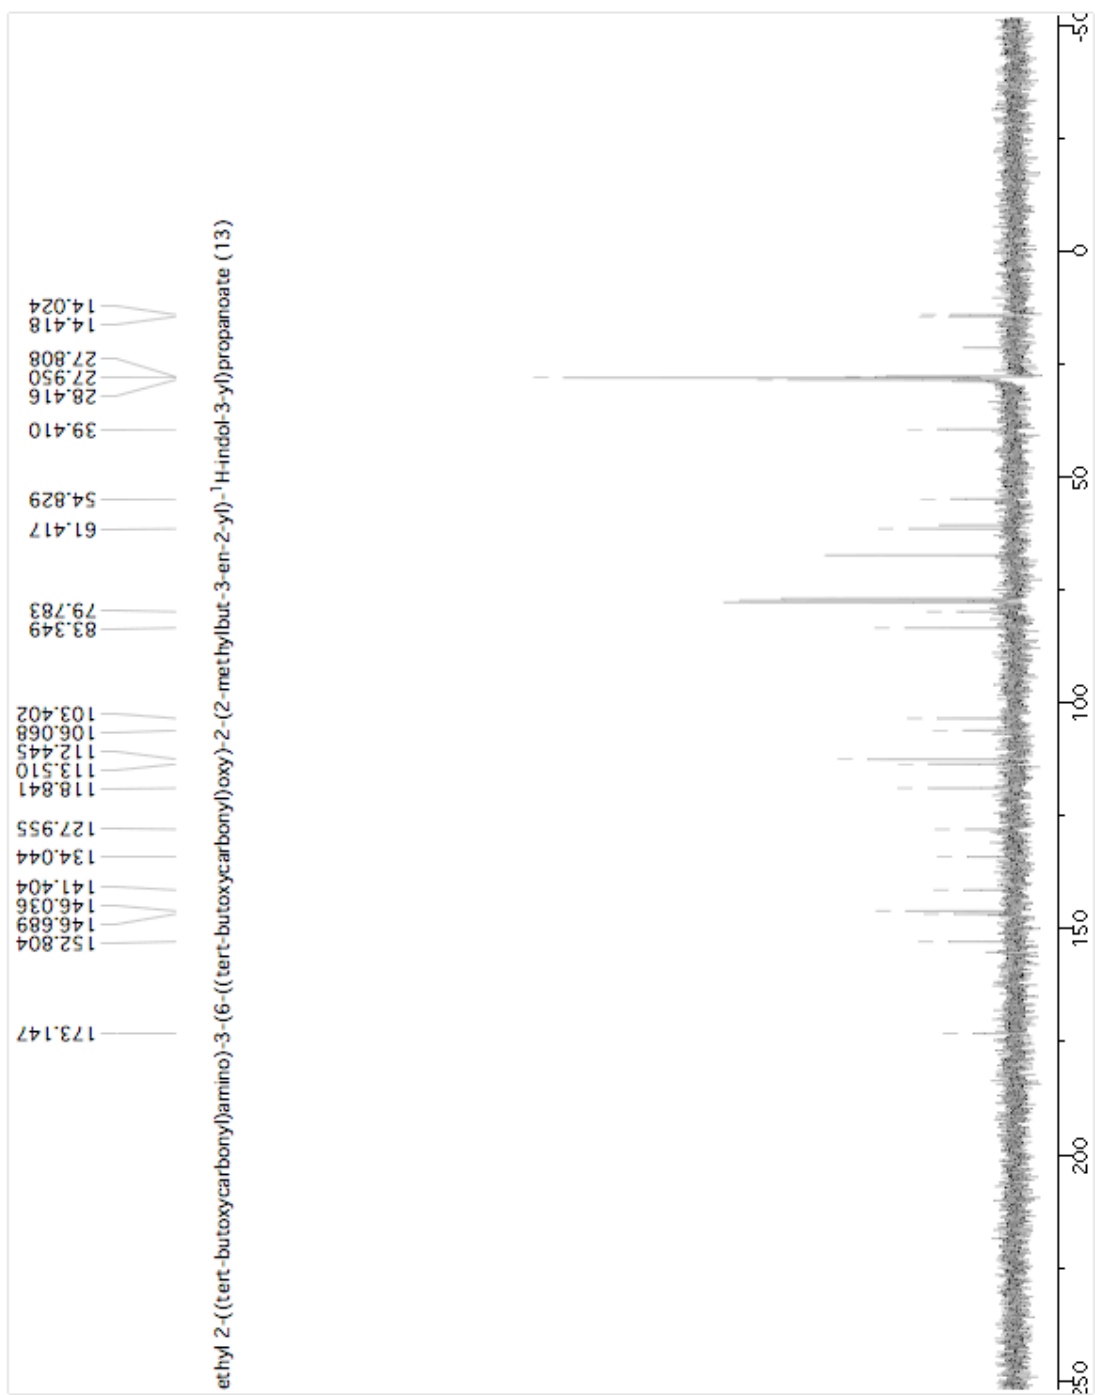

(<sup>2</sup>S)-ethyl-1-(2-((tert-butoxycarbonyl)amino)-3-(6-((tert-butoxycarbonyloxy)-2-(2-methylbut-3-en-2-yl)-1H-indol-3-yl)propanoyl)pyrrolidine-2-carboxylate (14)

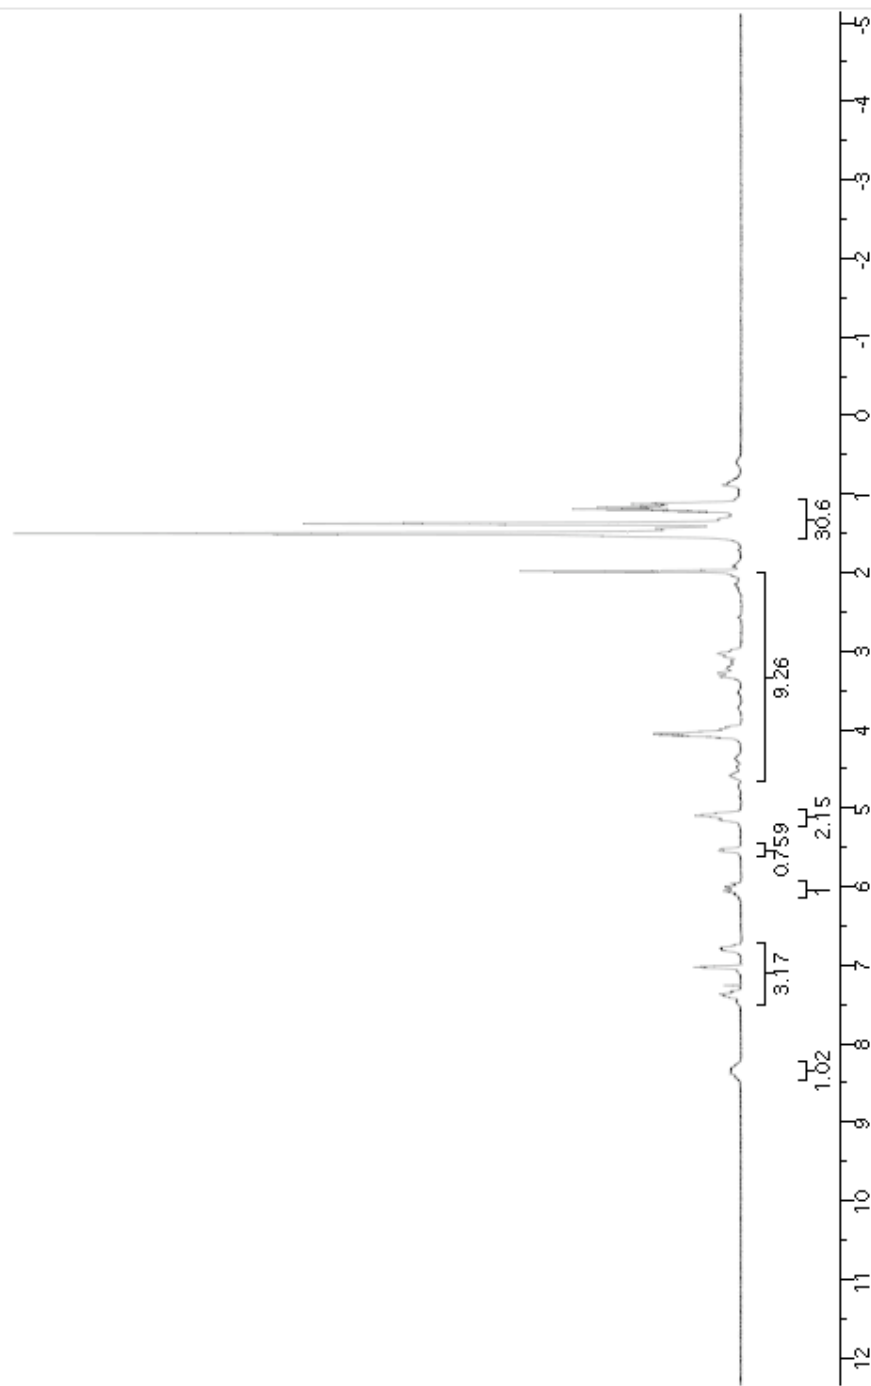

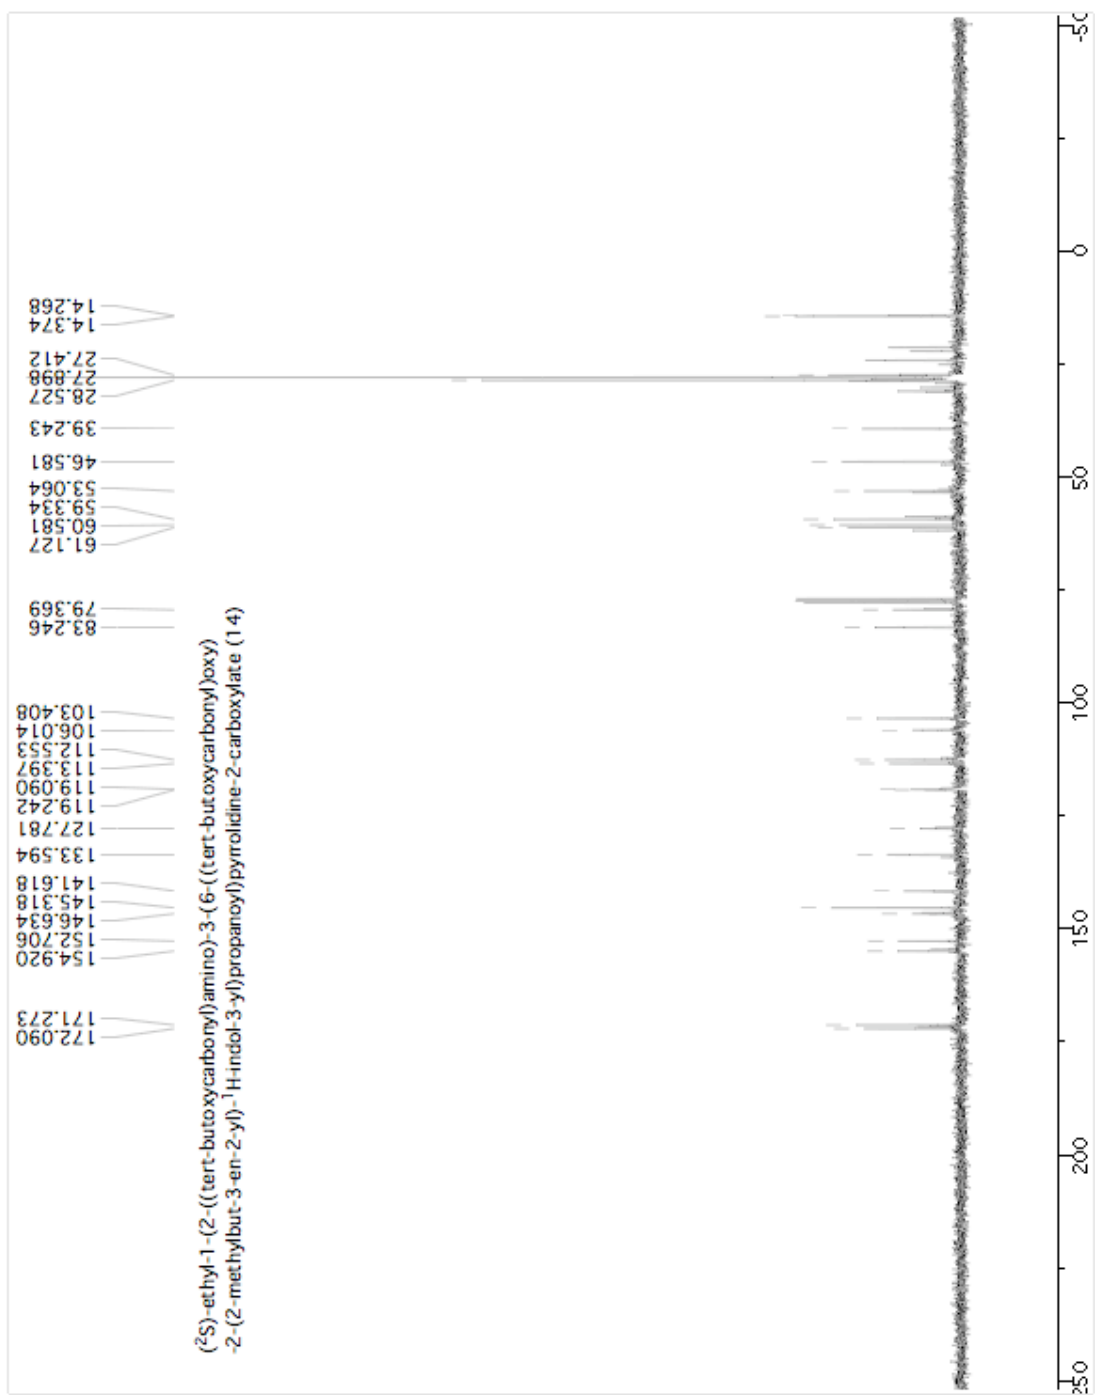

(3S,8aS)-3-((6-hydroxy-2-(2-methylbut-3-en-2-yl)-1H-indol-3-yl)methyl)-  
hexahydropyrrolo[1,2-a]pyrazine-1,4-dione (2)

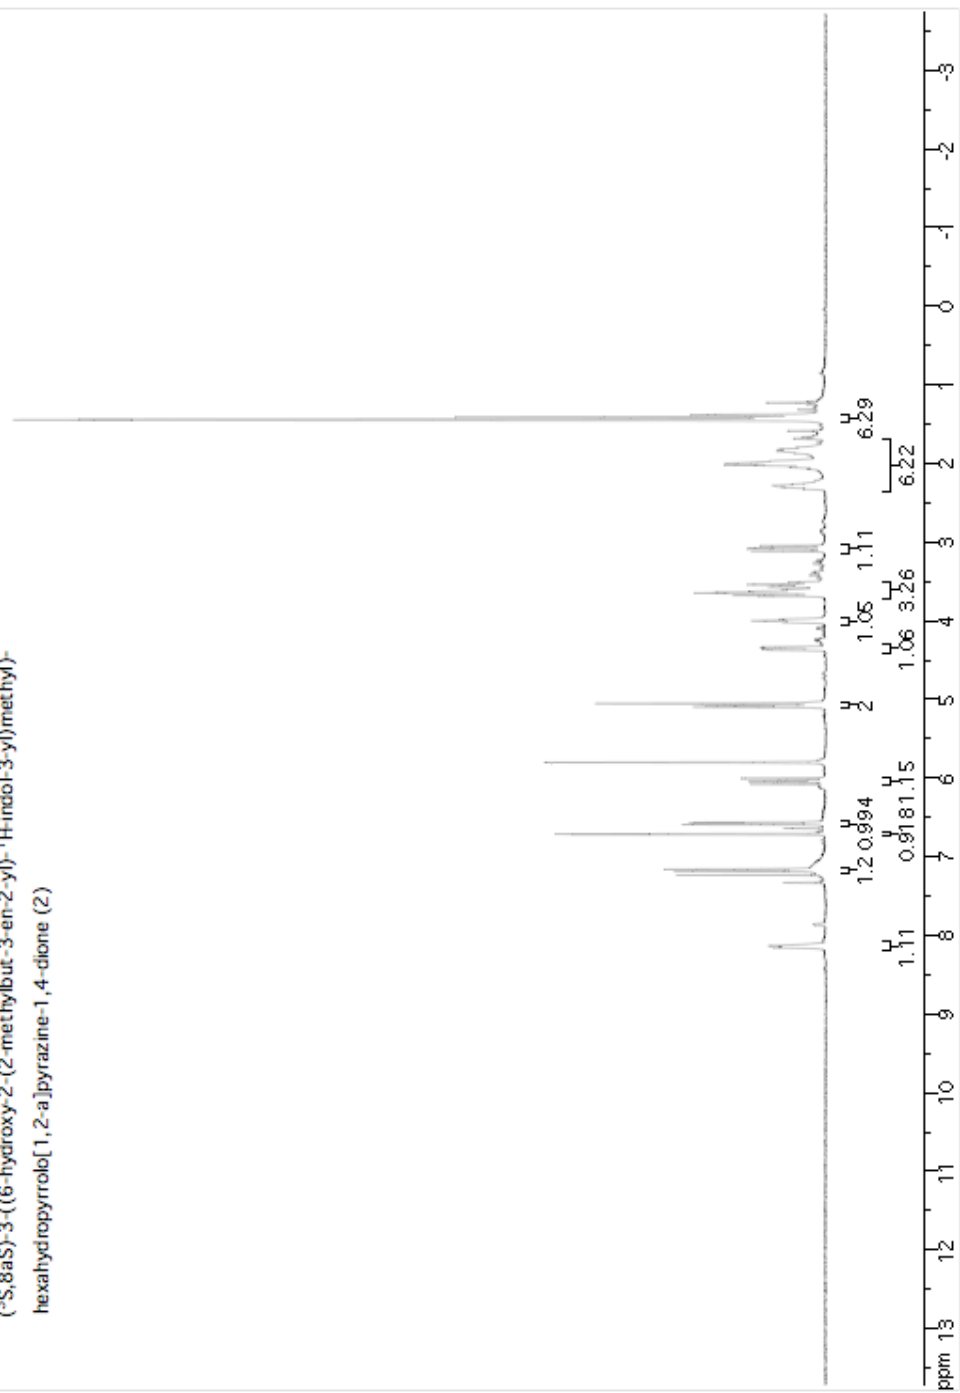

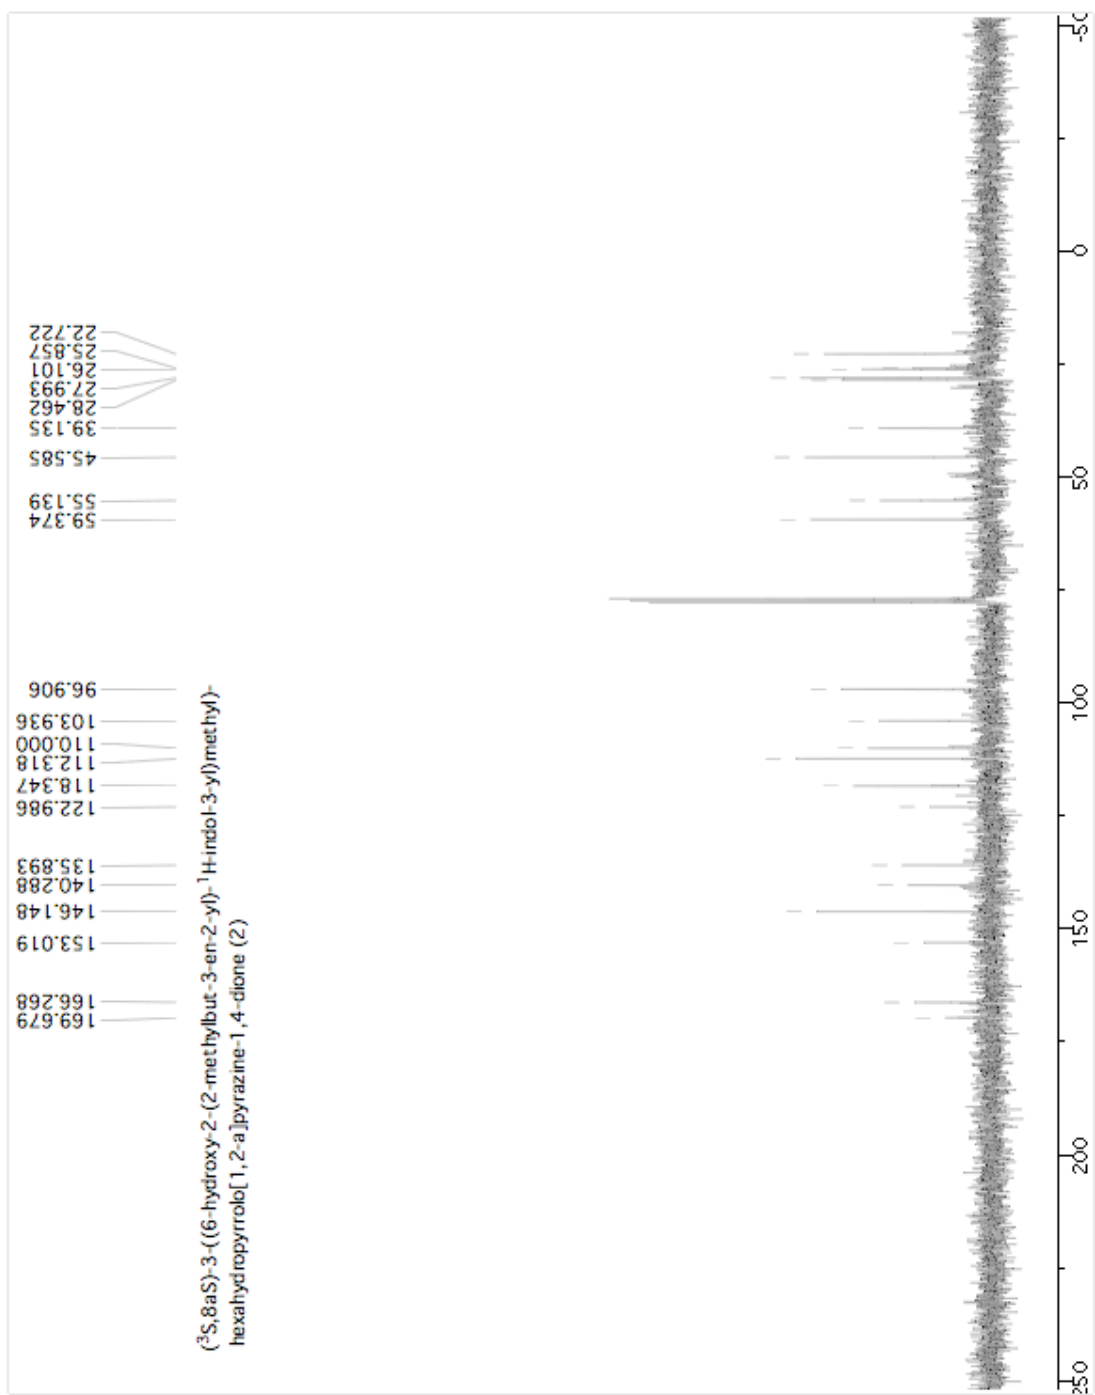

Notoamide J (1)

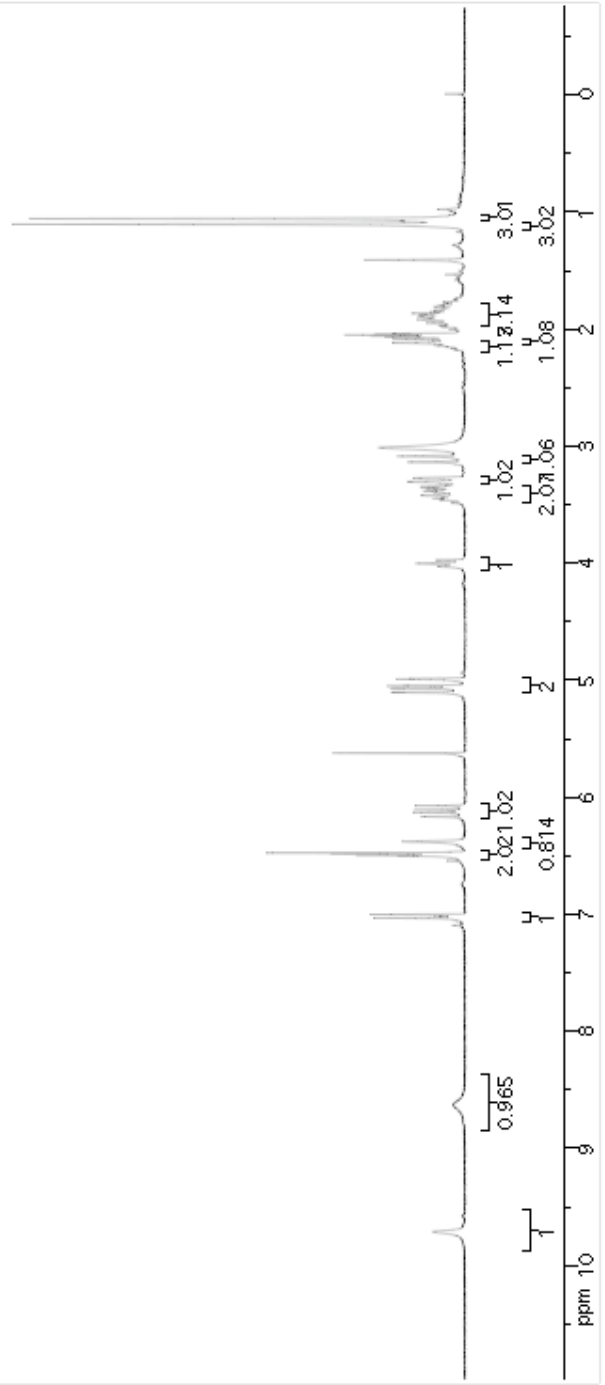

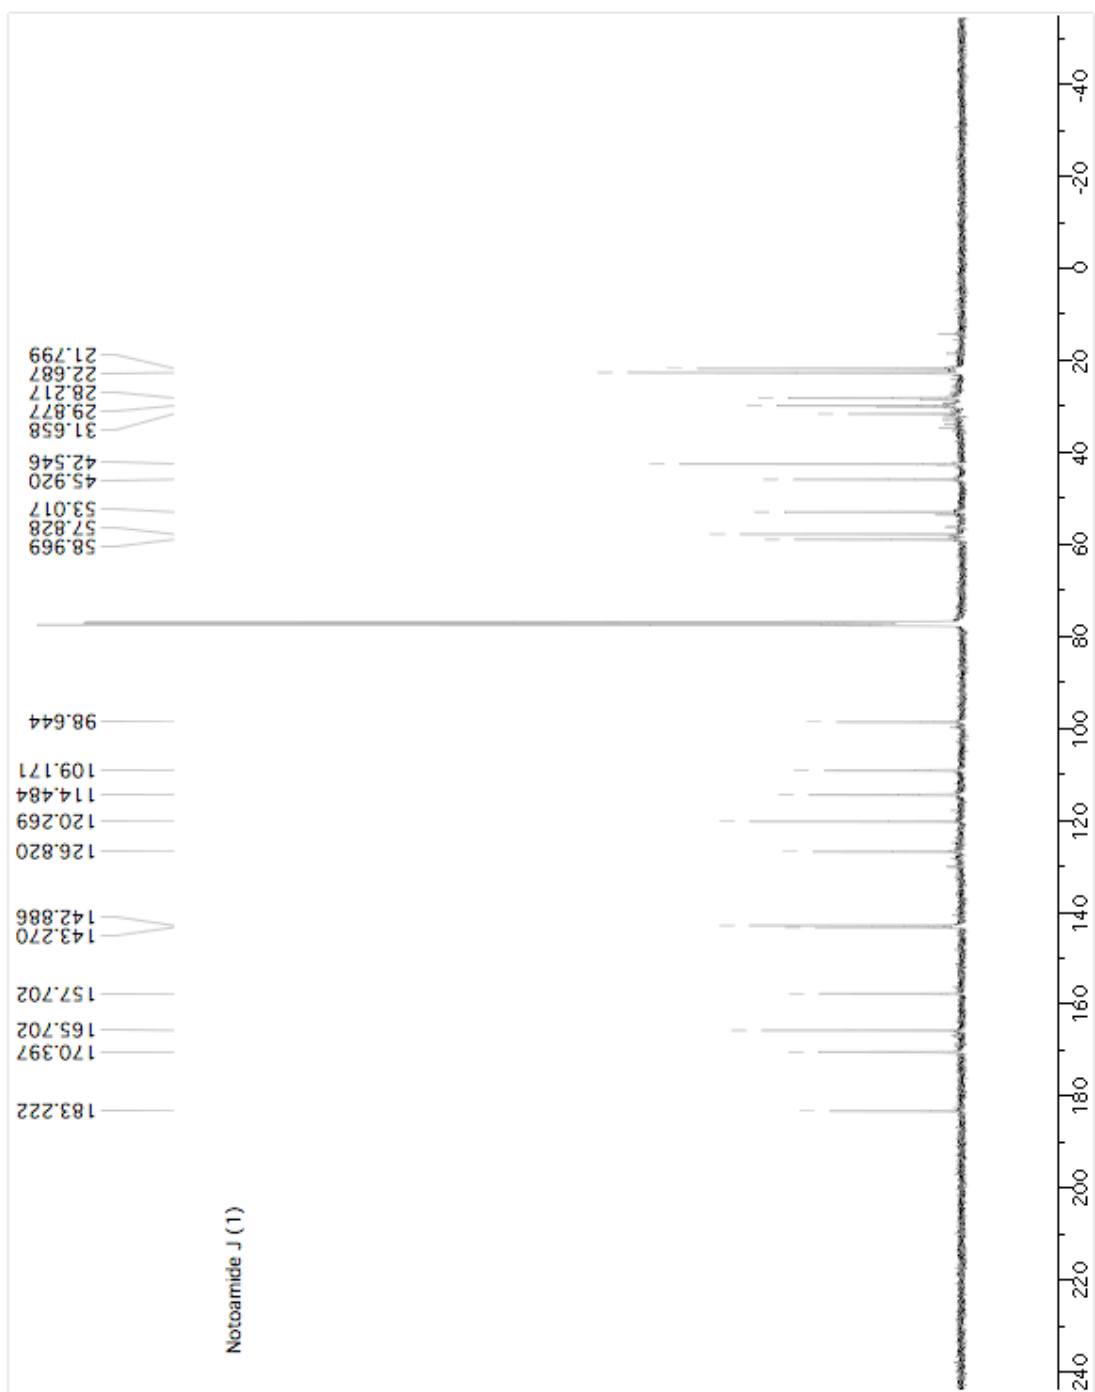



Copy of  $^1\text{H}$  NMR Spectrum of Natural Notoamide J.<sup>S3</sup>

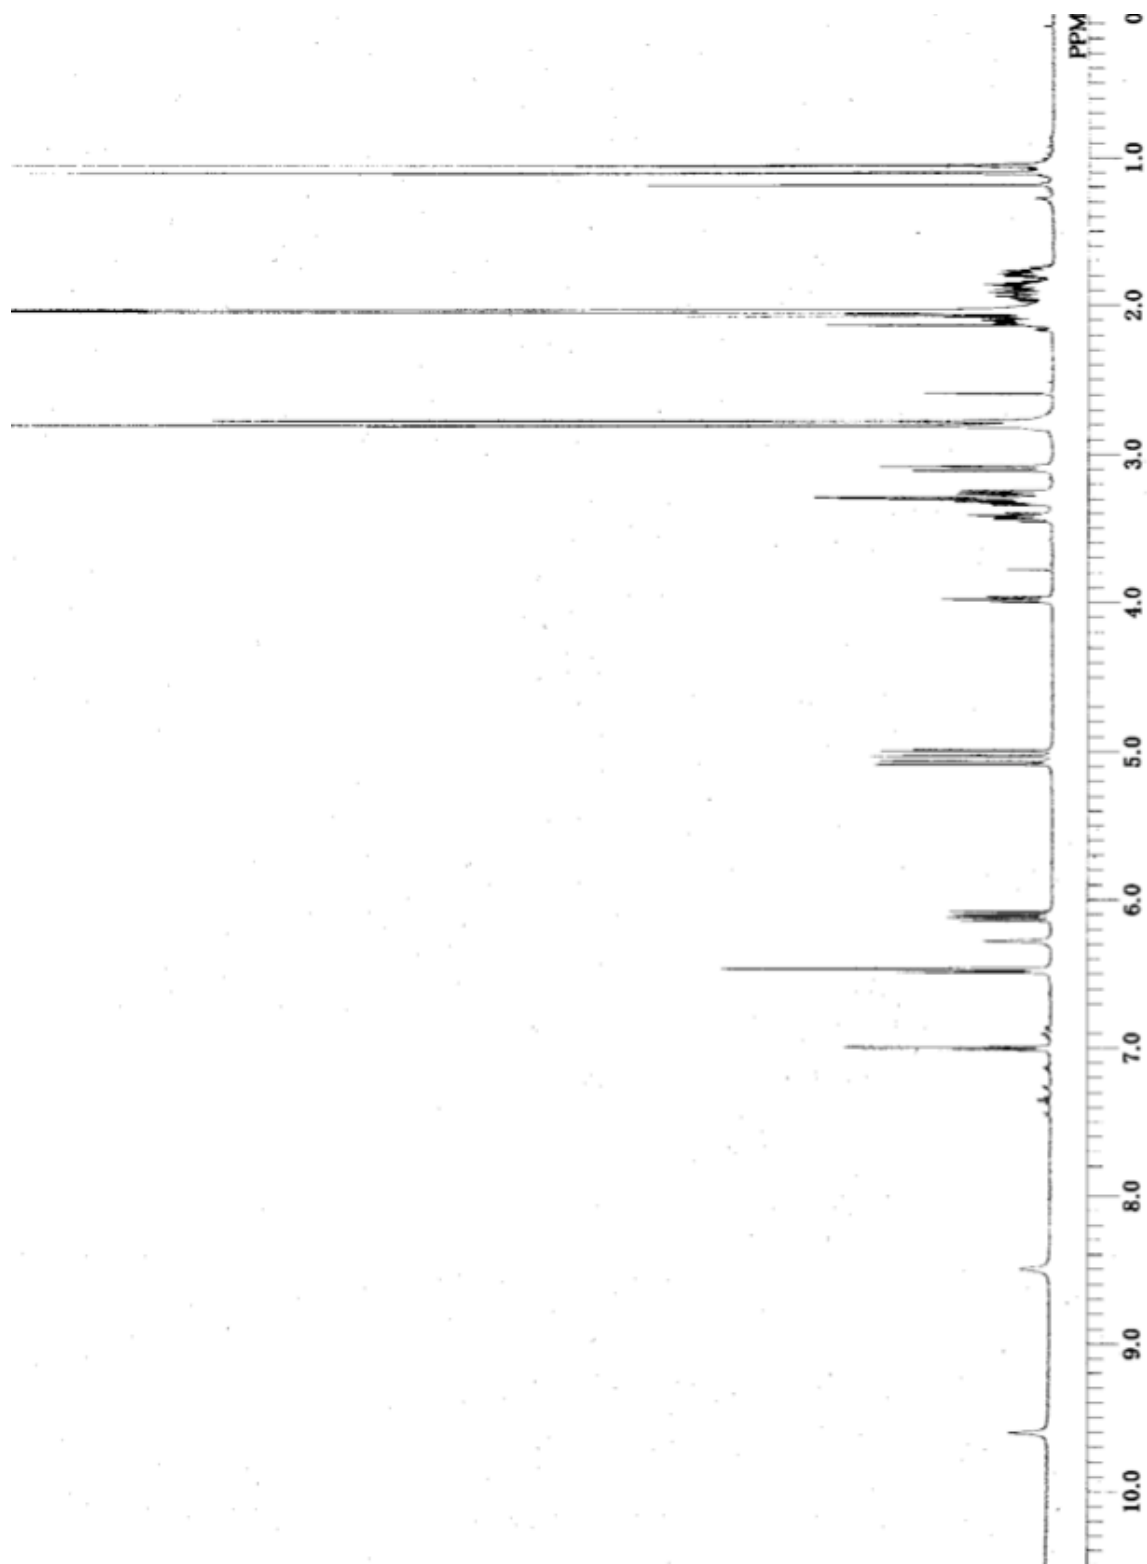

Comparison of CD of Natural Notoamide J<sup>S1</sup> with that of Synthetic **1**

(a)

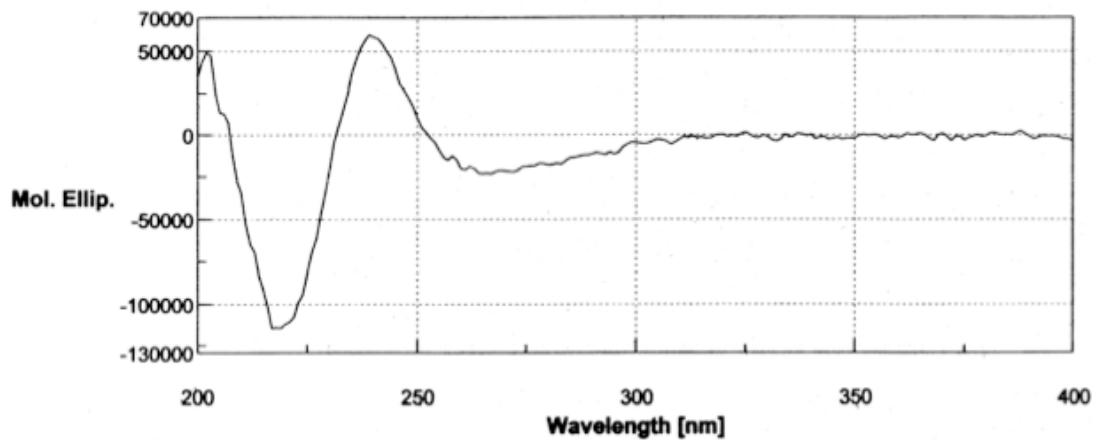

(b)

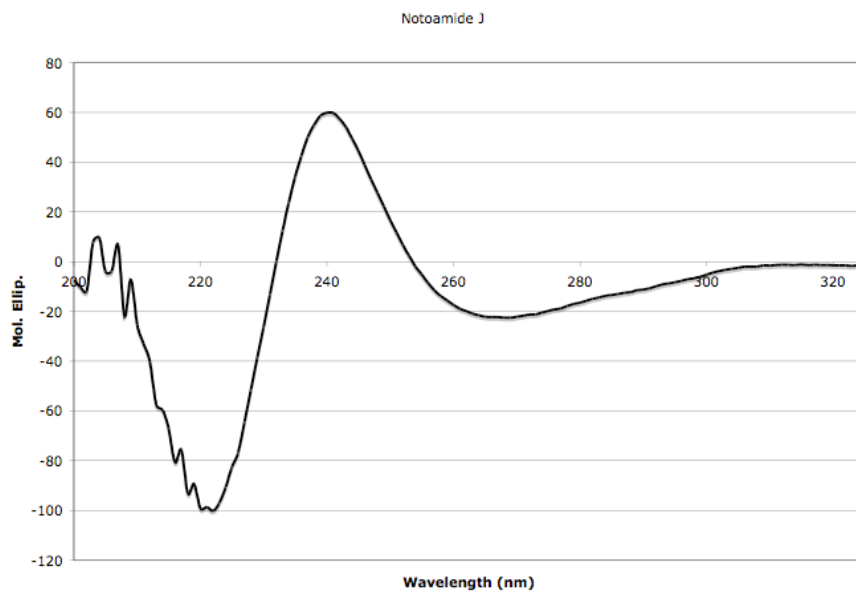

(a) CD of Natural Notoamide J<sup>S1</sup> (b) CD of Synthetic Notoamide J

References:

- S1. Tsukamoto, S.; Kato, H.; Samizo, M.; Nojiri, Y.; Onuki, H.; Hirota, H.; Ohta, T. *J. Nat. Prod.* **2008**, *71*, 2064-2067.
